# Supplementary material for: Implications for complex cognition from the hafting of tools with compound adhesives in the Middle Stone Age, South Africa
Source: HighWire-hosted journal article supplement (doi:10.1073/pnas.0900957106), 2009-05-12
Supplement: 0900957106SI.pdf [file 0900957106SI.pdf]

# Supporting Information

Wadley et al. 10.1073/pnas.0900957106

## SI Text

Sibudu is located  $\approx 40$  km north of Durban, South Africa,  $\approx 15$  km inland from the Indian Ocean, on a steep cliff overlooking the Tongati River. The shelter is 55 m long and  $\approx 18$  m in breadth. The excavation grid is in the northern part of the shelter at an altitude of  $\approx 100$  m above mean sea level. The present excavations, which are ongoing, began in 1998, and 21 m<sup>2</sup> of MSA deposit have been excavated by the Wadley team (1, 2).

Optically stimulated luminescence (OSL) dating of quartz grains has proved successful for dating the MSA deposits of Sibudu, and the OSL ages were obtained from single-grain analyses of sedimentary quartz (3–5) (Table S1). By examining a large number of individual grains, rigorous statistical procedures could be applied (3–5), resulting in final ages with good precision. The MSA occupation at Sibudu seems to have lasted from  $\approx 77$  ka to  $\approx 38$  ka. The 14 recent MSA age estimates are interesting because of the rarity of post-60 ka occupations at South African MSA sites.

The MSA cultural sequence is long and detailed, containing pre-Still Bay, Still Bay, Howiesons Poort, post-Howiesons Poort, and late and final MSA assemblages (1, 2, 6–11). The Sibudu pre-Still Bay is a flake-based industry with few formal tools. The Still Bay is also a flake-based industry, but it contains bifacial points, bifacial point fragments from double-pointed points, and bifacial tools (8). The tips of the points that were subjected to a use–trace analysis have clear animal residues, such as collagen, animal tissue, muscle tissue, fat, and bone (12). Some Still Bay points have traces of compound adhesives with mixtures of red ochre and plant gum on their bases where they would once have been hafted to shafts (12). Neither ochre nor plant gums are contaminants occurring in sediment samples from the immediate vicinities of the tools (12).

The Howiesons Poort above the Still Bay is a blade-based industry rich in backed tools, especially segments. These are shaped like the segment of an orange, with a sharp cutting edge on the straight lateral and a deliberately blunted, curved back. Many segments have ochre and plant adhesive traces on their curved backs where they would have been hafted to shafts or handles (13–15) (Fig. 1A); however, some segments lack ochre and instead have such products as fat mixed with plant material (Fig. 1B). The design of a segment with the cutting edge along its full length means that it may not have been possible to use twine as well as adhesive to attach the segments to their hafts. Thus, the adhesive would have needed to be especially robust. Quartz segments, which are much smaller than those made on other rocks (16), have simple plant gum on their ends more often than they have ochre (15), suggesting that they were hafted differently from the larger segments. At least some segments are likely to have functioned as arrowheads. Broken bone points are present in Howiesons Poort layers, and these seem to provide the earliest evidence for the use of bone arrowheads (17), which may have supplemented the use of stone arrowheads.

Backed tools were replaced by points after the Howiesons Poort. Points seem to have been consistently used as parts of weapons for hunting, most likely as the tips of spears (6, 7, 11). Use–trace analysis supports this interpretation because impact fractures and animal residues occur on the tips of the points. Many of the post-Howiesons Poort points have residues implying hafting with ochre-loaded adhesives (12, 13, 18–22), so the practice of using ochre-loaded adhesives is longstanding in the MSA. Furthermore, Sibudu is not alone in having MSA tools with ochre-loaded adhesives. A variety of ochred tools are present throughout the sequence at Rose Cottage Cave, Free State, South Africa (23). Segments from the Howiesons Poort of Rose Cottage have ochre traces (24), as do those from Umhlatuzana, KwaZulu-Natal, South Africa (14).

1. Wadley L, Jacobs Z (2006) Sibudu Cave: Background to the excavations, stratigraphy and dating. *S Afr Hum* 18:1–26.
2. Wadley L (2006) Partners in grime: Results of multi-disciplinary archaeology at Sibudu Cave. *S Afr Hum* 18:315–341.
3. Jacobs Z, Wintle AG, Duller GAT, Roberts RG, Wadley L (2008) New ages for the post-Howiesons Poort, late and final Middle Stone Age at Sibudu Cave, South Africa. *J Archaeol Sci* 35:1790–1807.
4. Jacobs Z, Wintle AG, Roberts RG, Duller GAT (2008) Equivalent dose distributions from single grains of quartz at Sibudu, South Africa: Context, causes and consequences for optical dating of archaeological deposits. *J Archaeol Sci* 35:1808–1820.
5. Jacobs Z, et al. (2008) Ages for the Middle Stone Age of southern Africa: Implications for human behavior and dispersal. *Science* 322:733–735.
6. Villa P, Delagnes A, Wadley L (2005) A late Middle Stone Age artefact assemblage from Sibudu (KwaZulu-Natal): Comparisons with the European Middle Palaeolithic. *J Archaeol Sci* 32:399–422.
7. Wadley L (2005) A typological study of the final Middle Stone Age stone tools from Sibudu Cave, KwaZulu-Natal. *S Afr Archaeol Bull* 60:51–63.
8. Wadley L (2007) Announcing a Still Bay industry at Sibudu Cave. *J Hum Evol* 52:681–689.
9. Cochrane GWG (2006) An analysis of lithic artefacts from the  $\sim 60$  ka layers of Sibudu Cave. *S Afr Hum* 18:69–88.
10. Delagnes A, Wadley A, Villa P, Lombard M (2006) Crystal quartz backed tools from the Howiesons Poort at Sibudu Cave. *S Afr Hum* 18:43–56.
11. Villa P, Lenoir M (2006) Hunting weapons of the Middle Stone Age and the Middle Palaeolithic: Spear points from Sibudu, Rose Cottage, and Bouheben. *S Afr Hum* 18:89–122.
12. Lombard M (2006) First impressions on the functions and hafting technology of Still Bay pointed artefacts from Sibudu Cave. *S Afr Hum* 18:27–41.
13. Lombard M (2006) Direct evidence for the use of ochre in the hafting technology of Middle Stone Age tools from Sibudu Cave. *S Afr Hum* 18:57–67.
14. Lombard M (2007) The gripping nature of ochre: The association of ochre with Howiesons Poort adhesives and Later Stone Age mastics from South Africa. *J Hum Evol* 53:406–419.
15. Lombard M (2008) Finding resolution for the Howiesons Poort through the microscope: Micro-residue analysis of segments from Sibudu Cave, South Africa. *J Archaeol Sci* 35:26–41.
16. Wadley L, Mohapi M (2008) A segment is not a monolith: Evidence from the Howiesons Poort of Sibudu, South Africa. *J Archaeol Sci* 35:2594–2605.
17. Backwell L, d'Errico F, Wadley L (2008) Middle Stone Age bone tools from the Howiesons Poort layers, Sibudu Cave, South Africa. *J Archaeol Sci* 35:1566–1580.
18. Lombard M (2004) Distribution patterns of organic residues on Middle Stone Age points from Sibudu Cave, KwaZulu-Natal, South Africa. *S Afr Archaeol Bull* 59:37–44.
19. Lombard M (2005) Evidence of hunting and hafting during the Middle Stone Age at Sibudu Cave, KwaZulu-Natal, South Africa: A multi-analytical approach. *J Hum Evol* 48:279–300.
20. Wadley L, Williamson BS, Lombard M (2004) Ochre in hafting in Middle Stone Age southern Africa: A practical role. *Antiquity* 78:661–675.
21. Williamson BS (2004) Middle Stone Age tool function from residue analysis at Sibudu Cave. *S Afr J Sci* 100:174–178.
22. Williamson BS (2005) in *From Tools to Symbols. From Early Hominids to Modern Humans*, eds d'Errico F, Backwell L (Witwatersrand Univ. Press, Johannesburg), pp 493–511.
23. Williamson BS (1997) Down the microscope and beyond: Microscopy and molecular studies of stone tool residues and bone implements from Rose Cottage Cave. *S Afr J Sci* 93:458–464.
24. Gibson NE, Wadley L, Williamson BS (2004) Microscopic residues as evidence of hafting on backed tools from the 60 000 to 68 000 year-old Howiesons Poort layers of Rose Cottage Cave, South Africa. *S Afr Hum* 16:1–11.



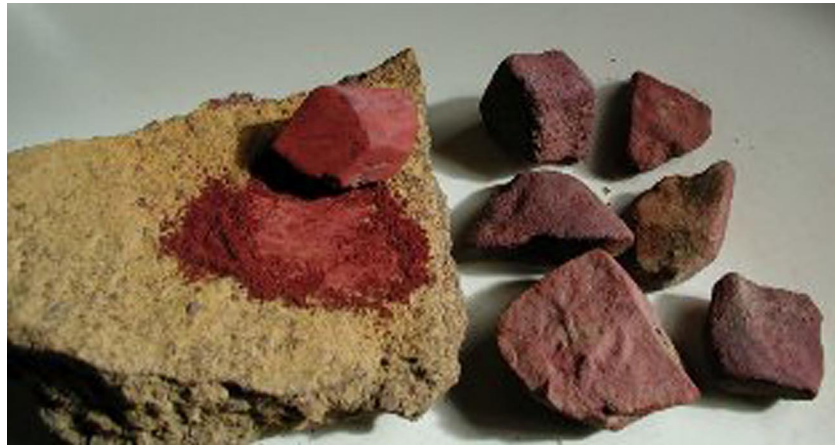

**Fig. S2.** Grinding nodules of red ochre no. 15 on a sandstone slab. Note the quartz grains that stand proud on the slab; these became incorporated in the ochre powder as coarse particles (1,180 to  $<180 \mu\text{m}$ ).

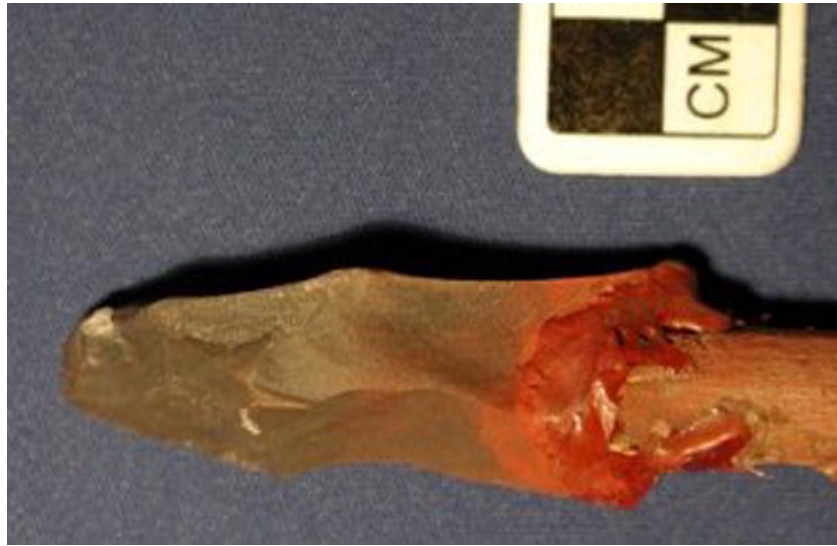

Fig. S3. Stone tool attached to its haft with adhesive made from red ochre no. 15 and *A. karroo* gum.

## Other Supporting Information Files

[Table S1 \(PDF\)](#)

[Table S2 \(PDF\)](#)

[Table S3 \(PDF\)](#)
